# Supplementary material for: Modulation of solid surface with desirable under-liquid wettability based on molecular hydrophilic–lipophilic balance
Source: Royal Society of Chemistry journal article supplement (doi:10.1039/d1sc00808k), 2021-01-01
Supplement: d1sc00808k1.pdf [file d1sc00808k1.pdf]

Electronic Supplementary Material (ESI) for Chemical Science.  
This journal is © The Royal Society of Chemistry 2021

Electronic supporting information

## **Modulation of solid surface with desirable under-liquid wettability based on molecular hydrophilic-lipophilic balance**

Yang Wang,<sup>a,d</sup> Qifei Wang,<sup>a</sup> Baixian Wang,<sup>a</sup> Ye Tian,<sup>c</sup> Jiancheng Di,<sup>\*a</sup> Zuankai Wang,<sup>d</sup> Lei Jiang<sup>c</sup> and Jihong Yu<sup>\*a,b</sup>

<sup>a</sup>State Key Laboratory of Inorganic Synthesis and Preparative Chemistry, College of Chemistry, Jilin University, Changchun 130012, P. R. China.

E-mail: jcdi@jlu.edu.cn; jihong@jlu.edu.cn.

<sup>b</sup>International Center of Future Science, Jilin University, Changchun 130012, P. R. China.

<sup>c</sup>Key Laboratory of Bio-Inspired Materials and Interfacial Science, Technical Institute of Physics and Chemistry, Chinese Academy of Sciences, Beijing 100190, P. R. China.

<sup>d</sup>Department of Mechanical Engineering, City University of Hong Kong, Hong Kong 999077, P. R. China.

## Table of contents

|                                                                                                                                                                    |     |
|--------------------------------------------------------------------------------------------------------------------------------------------------------------------|-----|
| Fig. S1. Fitted curves of SE for four kinds of representative grafted surfaces by OWRK method .....                                                                | S3  |
| Fig. S2. Relationship between under-liquid wettabilities of solid surfaces with their HLB values in the hexadecane–water system .....                              | S4  |
| Fig. S3. The emulsion separation of CSTPNM .....                                                                                                                   | S5  |
| Table S1. Surface groups and the corresponding molecular formula .....                                                                                             | S6  |
| Table S2. Components of SEs for various liquids .....                                                                                                              | S7  |
| Table S3. Components of SEs of the grafted surfaces, and the corresponding f values .....                                                                          | S8  |
| Table S4. Wettabilities of surfaces with varied kinds of groups .....                                                                                              | S9  |
| Table S5. Characteristic volumes for atoms $V_x$ ( $\text{m}^3 \text{mol}^{-1}$ ) ( $\times 10^{-5}$ ) .....                                                       | S10 |
| Table S6. Calculated group numbers of some lipophilic fragments .....                                                                                              | S11 |
| Table S7. Calculated group numbers of some hydrophilic fragments .....                                                                                             | S12 |
| Table S8. HLB values of surfaces with varied kinds of groups .....                                                                                                 | S13 |
| Table S9. The relationship between the reported wettabilities of surfaces with known chemical compositions and the predicted results based on the HLB values ..... | S14 |
| Table S10. Under-liquid wettabilities of two rough substrates .....                                                                                                | S15 |
| Note S1. The OWRK (Owen, Wendt, Rabel, and Kaelble) method .....                                                                                                   | S16 |
| Note S2. Comparison of the adhesion work ( $W_a$ ) .....                                                                                                           | S17 |
| References .....                                                                                                                                                   | S19 |

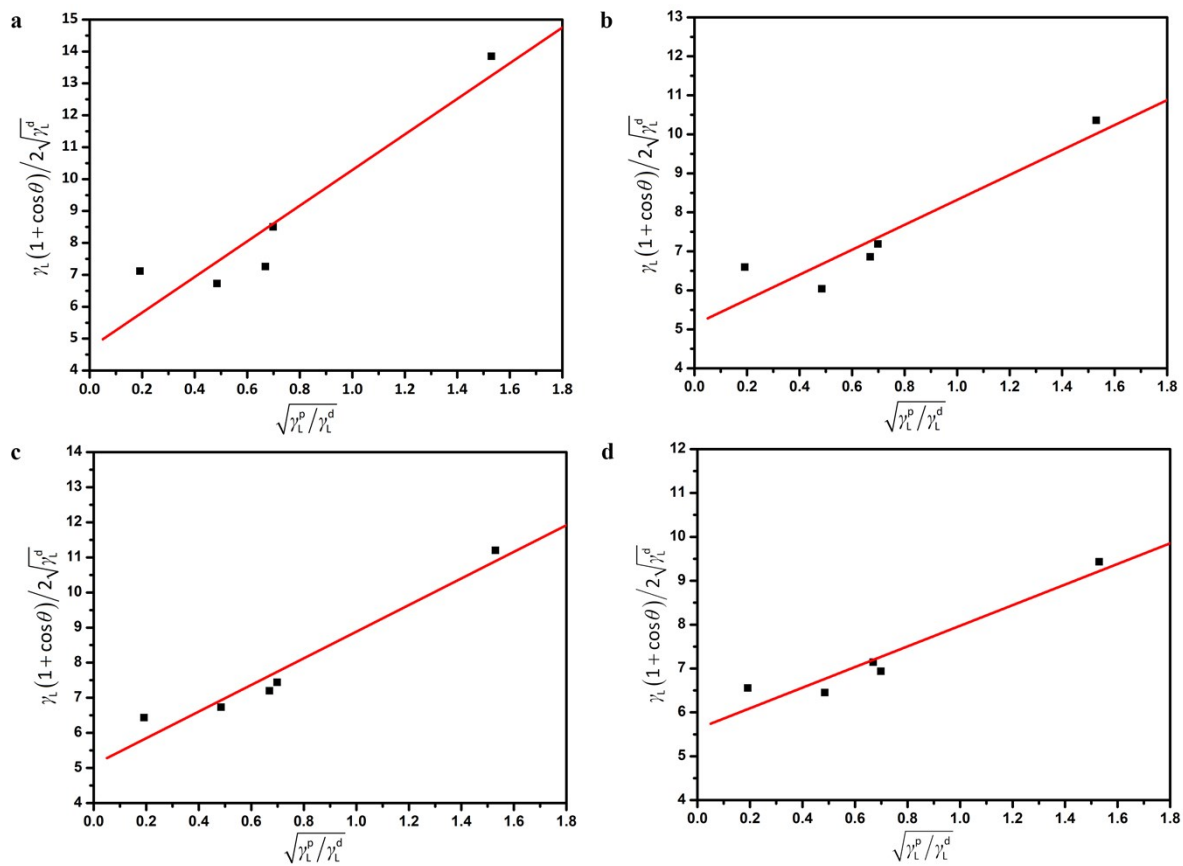

**Fig. S1.** Fitted curves of SE for four kinds of representative grafted surfaces by OWRK method. a) polydopamine, b) glycidylxypropyl group, c) methacrylate group, d) phenyl group.

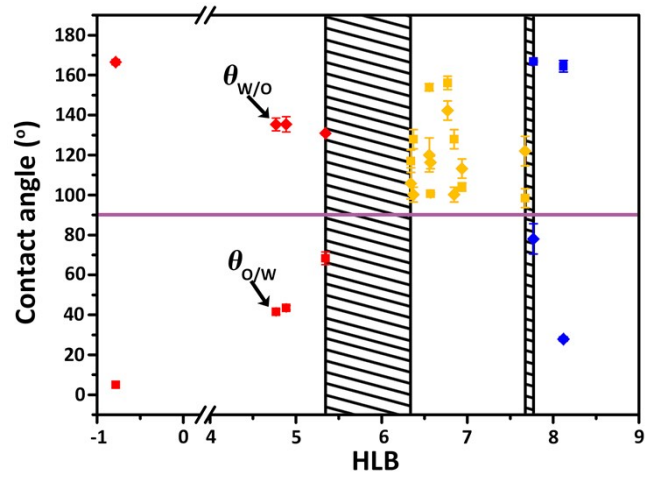

**Fig. S2.** Relationship between under-liquid wettabilities of solid surfaces with their  $f$  values in hexadecane-water system. ■:  $\theta_{o/w}$ , ◆:  $\theta_{w/o}$ , red: under-water oleophilic and under-oil hydrophobic, yellow: under-water oleophobic and under-oil hydrophobic, blue: under-water oleophobic and under-oil hydrophilic. Black shaded regions in the figure are the transition regions.

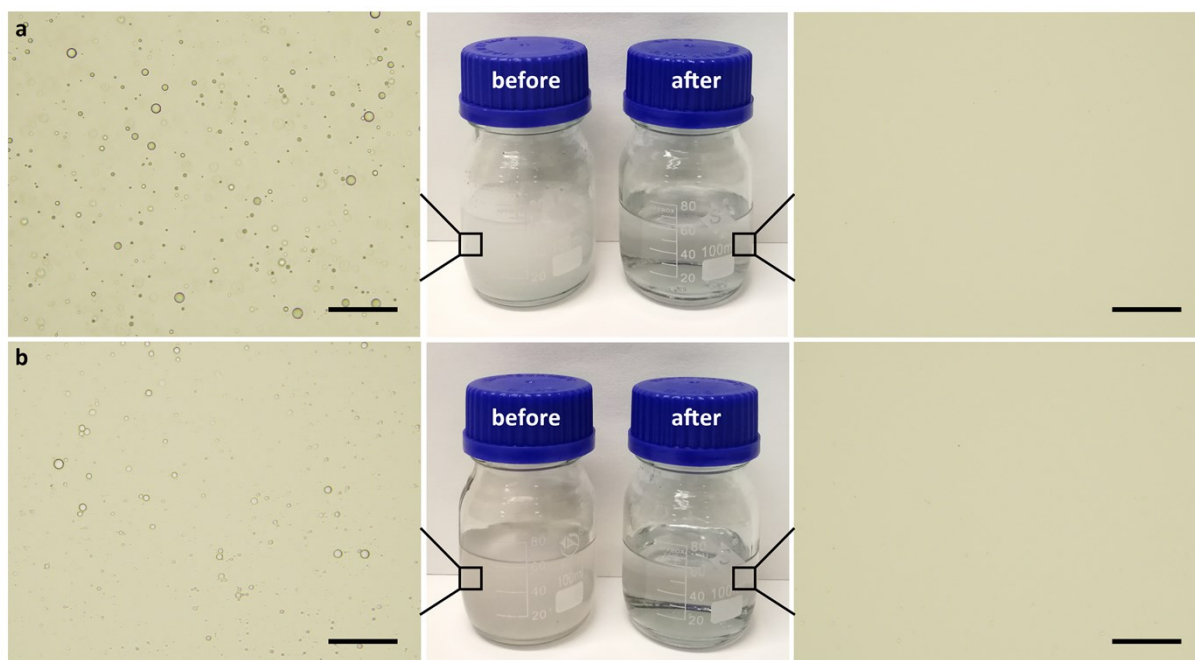

**Fig. S3.** The emulsion separation of CSTPNM. a) Oil-in-water emulsion, cyclohexane/water, stabilized by surfactant CTAB. b) Water-in-oil emulsion, water/cyclohexane, stabilized by surfactant SDBS. Scale bar, 100  $\mu\text{m}$ . The emulsions were prepared by mixing liquids with a volume ratio of 1:100, and then 2 mg/mL of surfactant was added under high stirring. 60 mL emulsion could be separated within 10 minutes.

**Table S1.** Surface groups and the corresponding molecular formula.

| Surface group     | Reagent                                       | Structural formula                                                                    |
|-------------------|-----------------------------------------------|---------------------------------------------------------------------------------------|
| Polydopamine      | Dopamine                                      | 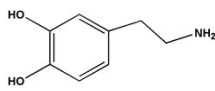   |
| Cyanopropyl       | 3-Cyanopropyltriethoxysilane                  |    |
| Cyanoethyl        | 2-Cyanoethyltriethoxysilane                   |    |
| Chloropropyl      | (3-Chloropropyl)triethoxysilane               |    |
| Iodopropyl        | (3-Iodopropyl)trimethoxysilane                |   |
| Mercaptopropyl    | (3-Mercaptopropyl)trimethoxysilane            |  |
| Aminopropyl       | (3-Aminopropyl)triethoxysilane                |  |
| Diamino           | N-(2-Aminoethyl)-3-aminopropyltriethoxysilane |  |
| Methacrylate      | 3-(Trimethoxysilyl)propyl methacrylate        |  |
| Isocyanate        | 3-(Triethoxysilyl)propyl isocyanate           |  |
| Glycidyloxypropyl | Triethoxy(3-glycidyloxypropyl)silane          |  |
| Phenyl            | Triethoxyphenylsilane                         |  |
| Hexadecyl         | Hexadecyltrimethoxysilane                     |  |



**Table S2.** Components of SEs for various liquids.

| Liquid                          | SE ( $\gamma$ )<br>mJ m <sup>-2</sup> | DSE ( $\gamma^d$ )<br>mJ m <sup>-2</sup> | PSE ( $\gamma^p$ )<br>mJ m <sup>-2</sup> |
|---------------------------------|---------------------------------------|------------------------------------------|------------------------------------------|
| water                           | 72.80                                 | 21.80                                    | 51.00 <sup>1</sup>                       |
| diiodomethane                   | 50.80                                 | 49.00                                    | 1.80 <sup>2</sup>                        |
| ethylene glycol                 | 48.80                                 | 32.80                                    | 16.00 <sup>3</sup>                       |
| <i>N, N'</i> -dimethylformamide | 36.50                                 | 25.20                                    | 11.30 <sup>4</sup>                       |
| hexadecane                      | 27.47                                 | 27.47                                    | 0 <sup>1</sup>                           |
| cyclohexane                     | 25.24                                 | 25.24                                    | 0 <sup>1</sup>                           |



**Table S3.** Components of SEs of the grafted surfaces, and the corresponding *f* values.

| Surface group     | Surface energy (mJ m <sup>-2</sup> ) |       |       |          |
|-------------------|--------------------------------------|-------|-------|----------|
|                   | DSE                                  | PSE   | SE    | <i>f</i> |
| Silicon hydroxyl  | 12.18                                | 54.61 | 66.79 | 4.484    |
| Polydopamine      | 22.10                                | 31.16 | 53.26 | 1.410    |
| Cyanoethyl        | 22.65                                | 23.48 | 46.13 | 1.037    |
| Isocyanate        | 21.20                                | 21.06 | 42.26 | 0.993    |
| Mercaptopropyl    | 25.27                                | 23.32 | 48.59 | 0.923    |
| Cyanopropyl       | 23.52                                | 20.60 | 44.11 | 0.876    |
| Diamino           | 26.19                                | 19.08 | 45.28 | 0.729    |
| Methacrylate      | 25.91                                | 14.38 | 40.30 | 0.555    |
| Aminopropyl       | 27.62                                | 15.12 | 42.74 | 0.547    |
| Glycidyloxypropyl | 26.23                                | 10.23 | 36.46 | 0.390    |
| Chloropropyl      | 29.34                                | 7.46  | 36.80 | 0.254    |
| Phenyl            | 31.63                                | 5.52  | 37.15 | 0.175    |
| Iodopropyl        | 38.47                                | 2.37  | 40.84 | 0.062    |
| Hexadecyl         | 26.20                                | 0.01  | 26.21 | ~0       |

**Table S4.** Wettabilities of surfaces with varied kinds of groups.

| Surface group    | Contact angle (°) |                |                |
|------------------|-------------------|----------------|----------------|
|                  | $\theta_w$        | $\theta_{o/w}$ | $\theta_{w/o}$ |
| Silicon hydroxyl | <5                | 164.4 ± 2.9    | 27.9 ± 1.1     |
| Polydopamine     | 39.1 ± 3.8        | 166.8 ± 0.4    | 78.0 ± 7.6     |
| Cyanoethyl       | 51.7 ± 0.8        | 127.9 ± 4.8    | 100.2 ± 3.7    |
| Isocyanate       | 56.8 ± 3.7        | 116.9 ± 5.6    | 105.8 ± 7.8    |
| Mercaptopropyl   | 48.9 ± 2.8        | 98.4 ± 4.7     | 122.0 ± 7.4    |
| Cyanopropyl      | 56.0 ± 1.3        | 115.2 ± 1.8    | 97.4 ± 5.0     |
| Diamino          | 56.4 ± 3.2        | 156.1 ± 3.4    | 142.3 ± 4.8    |
| Methacrylate     | 64.1 ± 0.6        | 100.6 ± 0.5    | 116.3 ± 3.1    |
| Aminopropyl      | 61.5 ± 2.6        | 153.9 ± 1.8    | 120.0 ± 8.5    |
| Glycidylxypropyl | 70.8 ± 2.4        | 104.0 ± 2.1    | 113.2 ± 4.8    |
| Chloropropyl     | 75.4 ± 1.5        | 68.3 ± 3.2     | 130.9 ± 0.9    |
| Phenyl           | 77.9 ± 0.7        | 41.5 ± 1.3     | 135.3 ± 3.2    |
| Iodopropyl       | 81.9 ± 2.0        | 43.5 ± 1.1     | 135.4 ± 3.8    |
| Hexadecyl        | 109.1 ± 2.6       | <5             | 166.5 ± 1.4    |

**Table S5.** Characteristic volumes for atoms  $V_x$  ( $\text{m}^3 \text{mol}^{-1}$ ) ( $\times 10^{-5}$ ).<sup>5</sup>

| H     | C     | N     | O     | F     |
|-------|-------|-------|-------|-------|
| 0.871 | 1.635 | 1.439 | 1.243 | 1.048 |
|       | Si    | P     | S     | Cl    |
|       | 2.683 | 2.487 | 2.291 | 2.095 |
|       | Ge    | As    | Se    | Br    |
|       | 3.102 | 2.942 | 2.781 | 2.621 |
|       | Sn    | Sb    | Te    | I     |
|       | 3.935 | 3.774 | 3.614 | 3.453 |

Note: For any bond between two atoms, whether it is single, double or triple bond, the  $V_x$  should be diminished value of  $0.656 \cdot 10^{-5} \text{ m}^3 \text{ mol}^{-1}$ .<sup>6</sup>

**Table S6.** Calculated group numbers of some lipophilic fragments.

| Fragment                         | $V_x$ | $n$ | Group number |
|----------------------------------|-------|-----|--------------|
| >C<                              | 0.323 | 0   | -0.109       |
| -CH<                             | 0.866 | 0   | -0.292       |
| -CH <sub>2</sub> -               | 1.409 | 0   | -0.475       |
| -CH <sub>3</sub>                 | 1.952 | 0   | -0.658       |
| =CH-                             | 1.194 | 0   | -0.402       |
| -CCl<                            | 2.09  | 0   | -0.704       |
| -Cl<                             | 3.448 | 0   | -1.162       |
| C <sub>6</sub> H <sub>5</sub> -  | 6.621 | 0   | -2.231       |
| =C<                              | 0.651 | 0   | -0.219       |
| =CH <sub>2</sub>                 | 1.737 | 0   | -0.585       |
| -CF <sub>2</sub> -               | 1.761 | 0   | -0.593       |
| -CF <sub>3</sub>                 | 2.48  | 0   | -0.836       |
| -C <sub>6</sub> H <sub>4</sub> - | 6.078 | 0   | -2.048       |

Note: For lipophilic fragments,  $n = 0$ .

**Table S7.** Calculated group numbers of some hydrophilic fragments.

| Fragment              | $V_x$ | $n$ | Group number |
|-----------------------|-------|-----|--------------|
| -C≡N                  | 2.09  | 1   | 0.796        |
| -N=C=O                | 2.677 | 2   | 2.098        |
| -SH                   | 2.178 | 1   | 0.766        |
| -NH <sub>2</sub>      | 1.541 | 1   | 0.981        |
| >NH                   | 0.998 | 1   | 1.164        |
| -COOCH <sub>2</sub> - | 3.562 | 2   | 1.800        |
| -O- (ether)           | 0.587 | 1   | 1.302        |
| -OH                   | 1.13  | 1   | 1.119        |

**Table S8.** HLB values of surfaces with varied kinds of groups.

| Surface group      | HLB    |
|--------------------|--------|
| Silicon hydroxyl   | 8.119  |
| Polydopamine       | 7.770  |
| Mercaptopropyl     | 7.673  |
| Glycidylloxypropyl | 6.937  |
| Cyanoethyl         | 6.846  |
| Diamino            | 6.770  |
| Methacrylate       | 6.571  |
| Aminopropyl        | 6.556  |
| Cyanopropyl        | 6.371  |
| Isocyanate         | 6.341  |
| Chloropropyl       | 5.346  |
| Iodopropyl         | 4.888  |
| Phenyl             | 4.769  |
| Hexadecyl          | -0.783 |

**Table S9.** The relationship between the reported wettabilities of surfaces with known chemical compositions and the predicted results based on the HLB values.

| Surface group     | HLB    | Prediction                  | Correctness <sup>a</sup> | Ref. |
|-------------------|--------|-----------------------------|--------------------------|------|
| Hydroxyl (plasma) | 8.119  | Under-water lipophobic/     | Y                        | 7    |
| Polydopamine      | 7.770  | Under-oil hydrophilic       | Y                        | 7    |
| Cyanopropyl       | 6.371  | Under-liquid dual-lyophobic | Y                        | 7    |
| Perfluorooctyl    | 2.243  |                             | Y                        | 7    |
| Perfluorodecyl    | 1.055  | Under-water lipophilic/     | Y                        | 8    |
| Octadecyl         | -1.733 | Under-oil hydrophobic       | Y                        | 7    |
| SU8               | -4.881 |                             | Y                        | 7    |

<sup>a</sup> Y: yes, the prediction is in accordance with the experimental result. N: no, the prediction is different from the experimental result. All the data are measured on the smooth solid surface.

**Table S10.** Under-liquid wettabilities of two rough substrates.

| Surface group    | SiNWs            |                  | STPNMs           |                  | HLB   |
|------------------|------------------|------------------|------------------|------------------|-------|
|                  | $\theta^*_{o/w}$ | $\theta^*_{w/o}$ | $\theta^*_{o/w}$ | $\theta^*_{w/o}$ |       |
| Mercaptopropyl   | 160.5 ± 2.7      | 166.3 ± 1.6      | 162.6 ± 2.1      | 158.9 ± 2.7      | 7.673 |
| Glycidyoxypropyl | 162.3 ± 2.0      | 161.2 ± 7.8      | 158.1 ± 2.5      | 157.3 ± 0.7      | 6.937 |
| Cyanoethyl       | 161.0 ± 1.3      | 129.6 ± 5.8      | 159.2 ± 1.9      | 151.2 ± 1.5      | 6.846 |
| Diamino          | 165.2 ± 4.1      | 153.5 ± 5        | 163.3 ± 3.6      | 155.7 ± 4.2      | 6.770 |
| Methacrylate     | 166.4 ± 0.4      | 168 ± 1.7        | 160.7 ± 2.3      | 155.2 ± 3.8      | 6.571 |
| Aminopropyl      | 164.7 ± 2.1      | 163.6 ± 1.4      | 162.5 ± 3.2      | 154.2 ± 3.4      | 6.556 |
| Cyanopropyl      | 163.5 ± 2.2      | 150.2 ± 3.7      | 159.4 ± 2.7      | 157.4 ± 2.6      | 6.371 |
| Isocyanate       | 163.4 ± 1.9      | 164.7 ± 1        | 160.7 ± 3.1      | 162.6 ± 2.4      | 6.341 |



**Note S1.** The OWRK (Owen, Wendt, Rabel and Kaelble) method.<sup>9,10</sup>

For the interface of solid surface and liquid, the work of adhesion can be expressed as follows:

$$W_a = \gamma_s + \gamma_L - \gamma_{sL} \quad (S1)$$

The adhesion can be divided into polar and dispersion parts. As proposed by Fowkes, the polar and dispersive interfacial attractions can be treated independently, and the polar-dispersive interactions can be neglected.

$$W_a = W_a^d + W_a^p = 2 \left( \sqrt{\gamma_s^d \gamma_L^d} + \sqrt{\gamma_s^p \gamma_L^p} \right) \quad (S2)$$

where  $W_a^d$  and  $W_a^p$  are the dispersive and polar component of  $W_a$ , and  $\gamma_s^d$ ,  $\gamma_s^p$ ,  $\gamma_L^d$ ,  $\gamma_L^p$  are DSE and PSE of solid and liquid, respectively.

According to Young's equation, when contact angle  $\theta > 0$ ,

$$\gamma_s = \gamma_{sL} + \gamma_L \cos \theta \quad (S3)$$

Combine these equations,

$$\frac{\gamma_L (1 + \cos \theta)}{2\sqrt{\gamma_L^d}} = \sqrt{\gamma_s^d} + \sqrt{\gamma_s^p} \frac{\sqrt{\gamma_L^p}}{\sqrt{\gamma_L^d}} \quad (S4)$$

The polar and dispersive components of the solvent are known, thus plotting the left side of Equation (S4) against  $\sqrt{\gamma_L^p} / \sqrt{\gamma_L^d}$  will theoretically produce a linear line of data points. Then  $\sqrt{\gamma_s^d}$  and  $\sqrt{\gamma_s^p}$  can be calculated with more than two liquids with given surface tension components (water, ethylene glycol, *N*, *N'*-dimethylformamide, nitromethane, and diiodomethane are used in this work).

**Note S2.** Comparison of the adhesion work ( $W_a$ ).

In the OWRK method, the interaction between liquid and solid surface, called adhesion work ( $W_a$ ), can be expressed as following equation:<sup>9,10</sup>

$$W_a = W_a^d + W_a^p = 2 \left( \sqrt{\gamma_s^d \gamma_L^d} + \sqrt{\gamma_s^p \gamma_L^p} \right) \quad (S5)$$

where  $W_a^d$  and  $W_a^p$  are the adhesion work generated by the DSE-DSE and PSE-PSE interfacial attractions, respectively.  $\gamma_s^d, \gamma_s^p$ , and  $\gamma_L^d, \gamma_L^p$  represent DSE and PSE of solid surface and the liquid, respectively. By introducing the concept of  $f$ , the above equation can be evolved into:

$$W_a = 2\sqrt{\gamma_s^d \gamma_L^d} \left( 1 + \sqrt{f_s f_L} \right) \quad (S6)$$

where  $f_s$  and  $f_L$  are the  $f$  values of the solid surface and the liquid, respectively. In the cyclohexane–water–solid system, the adhesion work between cyclohexane and solid surface is determined by the DSE-DSE interfacial attraction because of the  $f$  value of cyclohexane (denoted as  $f_o$ ) is approximately equal to 0 due to the nonpolar property (Supporting Information, Table S2), and  $\sqrt{f_s f_L}$  in Equation (S6) can be neglected.

The ratio of  $W_a$  at water–solid interface ( $W_{asw}$ ) to that at nonpolar oil–solid interface ( $W_{aso}$ ) that can reflect the competitive affinity of solid surface to water and oil is expressed as the following equation:

$$W_{asw} / W_{aso} = \sqrt{\gamma_w^d \gamma_o^d} \left( 1 + \sqrt{f_s f_w} \right) \quad (S7)$$

where the  $\gamma_w^d$  and  $\gamma_o^d$  are the DSE of water and oil, respectively.  $f_w$  is the  $f$  value of water, which is a constant value of 2.34 (Supporting Information, Table S2). In the cyclohexane–water–solid system, Equation (S7) can be converted into:

$$W_{asw} / W_{aso} = \sqrt{21.80 / 25.24} \left( 1 + \sqrt{2.34 f_s} \right) \approx 0.929 \left( 1 + \sqrt{2.34 f_s} \right) \quad (S8)$$

Therefore, the ratio of  $W_{asw}$  to  $W_{aso}$  is proportional to the square root of  $f_s$  value. Specifically, solid surfaces with higher  $f_s$  values exhibit stronger interfacial affinity to water; conversely, lower  $f_s$  means a stronger interfacial affinity to oil.

On the contrary, the ratio of  $W_a$  at water–solid interface ( $W_{asw}$ ) to that at polar oil–solid interface ( $W_{aso}$ ) is expressed as the following equation:

$$W_{asw} / W_{aso} = \sqrt{\gamma_w^d \gamma_o^d} \left( 1 + \sqrt{f_s f_w} \right) / \left( 1 + \sqrt{f_s f_o} \right) \quad (S9)$$

Since both the numerator and denominator contain  $f_s$  value in this equation, the change of  $W_{asw} / W_{aso}$  with  $f_s$  is complex, not monotonically increasing or decreasing. Therefore, it can be inferred that the effect of  $f_s$  on the under-liquid wettability of the solid surface should be different in the polar oil/water/solid and non-polar oil/water/solid systems.

## References

1. C. J. Van Oss, *Interfacial forces in aqueous media*, CRC Press, Boca Raton, FL, second edn., 2006.
2. S. Wu, *Polymer interface and adhesion*, M. Dekker, New York, 1982.
3. A. Toussaint, P. Luner and K. Mittal, *Contact angle, wettability and adhesion*, VSP Press, Utrecht, The Netherlands, 1993.
4. P.-J. Sell and D. Renzow, *Prog. Org. Coat.*, 1975, **3**, 323-348.
5. J. C. McGowan and R. Sowada, *J. Chem. Technol. Biotechnol.*, 1993, **58**, 357-361.
6. J. C. McGowan, *Tenside, Surfactants, Deterg.*, 1990, **27**, 229-230.
7. X. Tian, V. Jokinen, J. Li, J. Sainio and R. H. Ras, *Adv. Mater.*, 2016, **28**, 10652-10658.
8. P. Zhang, S. Wang and L. Jiang, *Small*, 2015, **11**, 1939-1946.
9. D. H. Kaelble, *J. Adhesion*, 1970, **2**, 66-81.
10. D. K. Owens and R. C. Wendt, *J. Appl. Polym. Sci.*, 1969, **13**, 1741-1747.
